# Supplementary material for: Biocompatible iron(iii) carboxylate metal–organic frameworks as promising RNA nanocarriers
Source: Royal Society of Chemistry journal article supplement (doi:10.1039/c9nr08127e), 2020-01-01
Supplement: c9nr08127e1.pdf [file c9nr08127e1.pdf]

## Supporting Information

### **Biocompatible iron(III) carboxylate Metal-Organic Frameworks as promising RNA nanocarriers**

*T. Hidalgo,<sup>a,b</sup> M. Alonso-Nocelo,<sup>c,d</sup> B.L. Bouzo,<sup>c,e</sup> S. Reimondez-Troitiño,<sup>c,e</sup> C. Abuin-Redondo,<sup>c</sup>  
M. de la Fuente,<sup>c,d\*</sup> P. Horcajada.<sup>a,b\*</sup>*

<sup>a</sup>. Advanced Porous Materials Unit (APMU), IMDEA Energy Institute, Av. Ramón de la Sagra 3, 28935 Móstoles-Madrid, Spain.

<sup>b</sup>. Institut Lavoisier, UMR CNRS 8180, Université de Versailles Saint-Quentin-en-Yvelines, 45 Av. des Etats-Unis, 78035 Versailles cedex, France.

<sup>c</sup>. Nano-Oncology Unit, Health Research Institute of Santiago de Compostela (IDIS), Clinical University Hospital of Santiago de Compostela (CHUS), CIBERONC, Santiago de Compostela, Spain.

<sup>d</sup>. Center for Research in Molecular Medicine and Chronic Diseases (CIMUS), Department of Pharmacy and Pharmaceutical Technology, School of Pharmacy, University of Santiago de Compostela, Campus Vida, Santiago de Compostela, Spain.

<sup>e</sup> Cancer Network Research (CIBERONC), 28029, Madrid, Spain

\*Corresponding authors:

patricia.horcajada@imdea.org  
maria.de.la.fuente.freire@sergas.es

## 1. Experimental section

**1.1. Materials.** Phosphate buffered saline (PBS) solution (0.01 M, pH=7.4), 4',6-diamidino-2-phenylindole dihydrochloride (DAPI), dimethylsulfoxide (DMSO;  $\geq 99.7\%$ ), hyClone trypsin protease and heat-inactivated fetal bovine serum (FBS), from Gibco-Life Technologies. Similarly, L-glutamine (2 mM), Tris/EDTA (10 mM, pH 7.4) and SYBR<sup>®</sup> Gold stain were provided from Life Technologies. Boric acid, ammonium persulfate, electrophoresis ladder (100bp low scale ladder), Tetramethylethylenediamine (TEMED), Tris-borate-EDTA buffer (TBE), Thermo Scientific<sup>™</sup> RNase A-DNase & protease-free (10 mg.mL<sup>-1</sup>) and penicillin/streptomycin (100 U.mL<sup>-1</sup>) were purchased from Fischer. Iron(III) chloride hexahydrate (97 %), 1,3,5-benzene tricarboxylic acid (trimesic acid; 95 %), DMEM medium supplemented with glutamax-1, mowiol fluorescent mounting medium (Mowiol<sup>®</sup>4-88), *p*-formaldehyde 4%, agarose, acrylamide/Bis acrylamide (30%) solution, Trizma base, glycerol, ethylenediaminetetraacetic acid disodium salt dehydrate (EDTA, 0.5M, pH=8) and aminoterephthalic acid (98%) were purchased from Sigma-Aldrich. The reactive thiazolyl blue tetrazolium bromide (MTT) was provided by Alfa Aesar. The non-specific siRNA duplexes containing the sequences sense: 5' AGG UAG UGU AAU CGC CUU G 3' antisense: 3' CAA GGC GAU UAC ACU ACC U 5', together with the RNA oligo (miR-145) containing the sequences sense: 5'GUC CAG UUU UCC CAG GAA UCC CU 3' and the non-specific siRNA containing a fluorescent Cy5 labelled sense strand used for cellular uptake studies were purchased in Eurofins Genomics. MicroRNA Purification Kit was bought in Norgen Biotek Corporation. qScript<sup>™</sup> microRNA cDNA Synthesis kit, PerfeCta<sup>®</sup> Universal PCR Primer and PerfeCta<sup>®</sup> SYBR<sup>®</sup> Green SuperMix, Low ROX<sup>™</sup> were supplied by Quanta Biosciences. Primer miRNA 145 (hsa-miR-145-5p and the housekeeping small RNA control primer (RNU6) were bought at IDT and Fisher Scientific, respectively.

**1.2. Synthesis of MIL-100 and MIL-101\_NH<sub>2</sub> NPs.** MIL-100 NPs were synthesized by microwave-assisted hydrothermal synthesis, according to a previously reported procedure.<sup>1</sup> Activation or purification of 2.5 g of MIL-100 consisted on the centrifugation (10500 rpm, 20 min) and re-dispersion of the NPs in 20 mL of distilled water and five successive times in 20 mL absolute ethanol. Further activation was carried out by re-dispersing the solid in 20 mL of a 0.1 M KF solution. The mixture was kept under magnetic stirring for 1 h 40 min under ambient conditions. Immediately after, NPs were collected by centrifugation (10500 rpm, 20 min) and washed twice with 20 mL of distilled water and once with 20 mL of absolute ethanol following the process described above. Activated MIL-100 NPs were isolated by centrifugation (10500 rpm, 20 min) and stored wet with few droplets of fresh absolute ethanol to avoid complete drying of the product. Prior to the *in vitro* experiments, NPs were exchanged in ultrapure water.

MIL-101\_NH<sub>2</sub> NPs was obtained from a solution of 90.5 mg of aminoterephthalic acid and 135 mg of FeCl<sub>3</sub>·6H<sub>2</sub>O in 25 mL of distilled water placed into a Teflon-liner at 60°C for 5 min under microwave irradiation at 400W.<sup>2,3</sup> The obtained product was recovered by centrifugation at 10500 rpm for 10 min. With the purpose of removing the free acid, the solid was washed with absolute ethanol for 5 min, centrifuged (10500 rpm, 20 min) and kept wet. Prior to the *in vitro* experiments, NPs were exchanged in ultrapure water.

**1.3. Physicochemical characterization.** X ray powder diffraction (XRPD) were collected in a D8 Advance Bruker diffractometer with Cu K $\alpha$ 1 radiation ( $\lambda$ = 1.54056 angstroms) from 3 to 20 $^\circ$  (2 $\theta$ ) using a step size of 0.02 $^\circ$  and 2.5s per step in continuous mode. Fourier transform infrared (FTIR) spectra were collected using a Nicolet 6700 instrument (Thermo Scientific, USA) from 4000 to 400 cm $^{-1}$ . N $_2$  adsorption isotherms were obtained at 77K using a BELsorp Mini (Bel, Japan). Prior to the analysis, approximately 20 mg of sample were evacuated at 37 $^\circ$ C under primary vacuum for 3h. Thermogravimetric analyses (TGA) of the room temperature (RT) samples (5-10 mg) were analyzed on a Perkin Elmer Diamond TGA/DTA STA 6000 under O $_2$  atmosphere (20 mL $\cdot$ min $^{-1}$ ), at heating speed of 3 $^\circ$ C $\cdot$ min $^{-1}$  for the temperature range between RT and 600 $^\circ$ C. Particle size was monitored by Dynamic Light Scattering (DLS) on a Zetasizer Nano (Malvern Instruments; Note that is very reproducible between batches: a potential wider particle size distribution of this type of particles (with frequently 10-30% standard deviation) is probably associated to their formation mechanism (including nucleation and growth). Samples were prepared by dispersing NPs at 1 mg $\cdot$ mL $^{-1}$  at 37 $^\circ$ C in the desired media by the use of an ultrasound tip (30% amplitude for 2 min; Digital Sonifer 450, Branson). NP size evolution was also monitored before and after the incubation of NPs with the siRNA. The Fourier transform infrared (FTIR) spectra were collected in a Nicolet 6700 instrument from Thermo Scientific.

**1.4. siRNA encapsulation into MIL-100 and MIL-101\_NH $_2$  NPs.** For the entrapment of small interfering RNA (siRNA) into the MIL-100 and MIL-101\_NH $_2$  NPs were previously suspended in aqueous solutions (1 mg $\cdot$ mL $^{-1}$ , note here that NPs are weighted wet based on the wet:dry ratio previously determined from NPs dry at 100 $^\circ$ C overnight),<sup>4</sup> adjusting the pH to either 2 or 4 using a HCl 0.1 M solution. Then, 125  $\mu$ L of a siRNA aqueous solution (at a concentration of 0.1 mg $\cdot$ mL $^{-1}$ ) were added to 125  $\mu$ L of the previously prepared NPs suspension (keeping a molar ratio 20:1). The resulting suspension was magnetically stirred at room temperature (RT) for 1 h. The siRNA loaded nanoMOFs were recovered by centrifugation at 14500 rpm for 15 min and kept wet.

### **1.5. Binding Assay.**

The association efficacy was also indirectly determined by quantifying the amount of non-associated siRNA in the supernatant, collected by centrifugation (14000 rpm, 15 min) upon the siRNA association. The amount of free siRNA was determined by fluorescence spectroscopy, quantifying the SYBR $^\circ$ Gold-labelled siRNA (Table S1). The fluorescence spectra of siRNA-loaded NPs were performed on RNase free H $_2$ O medium to determine the excitation ( $\lambda_{ex}$ ) and emission ( $\lambda_{em}$ ) wavelengths, which were respectively 300 and 537 nm, being collected on an Envision Multidetector (Fluorescein High Precision Monocromator, Perkin Elmer). The calibration curves of siRNA in RNase free H $_2$ O were obtained in the range of concentrations from 0.25 to 2  $\mu$ g $\cdot$ mL $^{-1}$  with regression factors > 0.99.

Note that the differences from theoretical-experimental RNA loading could be because no steric limitations were taken into account in the theoretical calculations in order to simplify the process.

### **1.6. RNA Enzyme Degradation Stability.**

The siRNA entrapment into the MIL-100 and MIL-101-NH<sub>2</sub> NPs was performed as explained in the section 1.4. The recovered siRNA loaded nanoMOFs by centrifugation was resuspended with 92.5  $\mu\text{L}$  of RNase-free water and 10  $\mu\text{L}$  of the enzyme solution (endoribonuclease RNase A: Thermo Scientific™ RNase A-DNase & protease-free (10 mg·mL<sup>-1</sup>)). The mixtures were incubated for 20 min at 37°C and after this time, half of each suspension was centrifuged, keeping each supernatant. Negative controls of MOF only with and without enzyme were also prepared. For this purpose, 12.5  $\mu\text{g}\cdot\text{mL}^{-1}$  of non-specific siRNA of each formulation were added in a total volume of 30  $\mu\text{L}$ , placed in a 1% (w/v) agarose gel at 90 V for 30 min in TBE buffer (Figure S4). For visualization, 2  $\mu\text{L}$  of SYBR® Gold (in 1:1000-fold dilution of stock dye solution), a fluorescent cyanine dye used for staining the RNA, were added in each well. The nucleic acid gels were detected by the fluorescence of SYBR® Gold using Gel Doc™ XR+ system.<sup>5</sup>

### **1.7. Colloidal stability test.**

NanoMOFs and RNA@nanoMOFs were dispersed at 1 mg·mL<sup>-1</sup> by using an ultrasound tip in different media (water, PBS-FBS (10%) and DMEM). Colloidal stability was evaluated by dynamic light scattering (DLS; Zetasizer Nano, Malvern Instruments) following the evolution of the particle size and the  $\zeta$ -potential at pH 2 and pH 4 maintaining the T<sup>a</sup> at 37°C before and after the siRNA association.

### **1.8. In vitro cell studies.**

**1.8.1. Cells and culture.** SW480 cell line (ATCC®CCL-228™) was maintained in DMEM (Dulbecco's Modified Eagle) medium supplemented with glutamax-1 with 10% of heated-inactivated FBS and 1% penicillin/streptomycin at 37°C in a humidified 5% CO<sub>2</sub> atmosphere and passaged twice a week (at 80% of confluence) at a density of 5 x 10<sup>4</sup> cells per cm<sup>2</sup>.

**1.8.2. Cytotoxicity studies.** The cytotoxic activity of MIL-100 and MIL-101-NH<sub>2</sub> NPs was analyzed by the MTT assay.<sup>6,7</sup> Adherent SW480 cells were seeded 24h prior to the assay in 96-well plates at a density of 1x10<sup>4</sup> cells per well in DMEM supplemented medium. The treatments were prepared at a 3-fold higher concentration (due to a direct 1/3 direct dilution in the well, as 50  $\mu\text{L}$  of the NP solutions were added to a final volume of 200  $\mu\text{L}$  per well). MIL-100 and MIL-101-NH<sub>2</sub> NPs solutions were incubated with the cells at different concentrations (from 50 to 1200  $\mu\text{g}\cdot\text{mL}^{-1}$ ) and kept at 37°C with a 5% CO<sub>2</sub> atmosphere. The cytotoxicity was determined upon 24h incubation of the systems, by adding the MTT reactant (0.5 mg·mL<sup>-1</sup> in PBS, incubation at 37°C during 4h) followed by the addition of 200  $\mu\text{L}$  of DMSO to each well. Absorbance was determined at  $\lambda = 539$  nm under stirring.

**1.8.3. Hemolysis assay.** Fresh human erythrocytes were washed with PBS, followed up with a centrifugation (1000 rpm, 10 min), and several rinse cycles of the cell pellet ( $\pm$  3-4 cycles). Once a clear supernatant was obtained, a suspension of 3% of erythrocytes was incubated 1:1 with different concentrations of MIL-100 and MIL-101-NH<sub>2</sub> NPs, from 0.5 to 0.01 mg·mL<sup>-1</sup> at 37°C. After different incubation times (15 min and 1h), the 96-well plate was centrifuged, determining hemoglobin release in the supernatant by the absorbance measured at 537 nm. In this experiment, PBS and Triton X-100 solutions were used as negative and positive controls, respectively.<sup>8,9</sup>

**1.8.4. Cell internalization studies.** SW480 cells (ATCC®CCL-228™) were cultured in DMEM supplemented with glutamax-1, 10% of heated-inactivated FBS and 1% penicillin/streptomycin. Cells were seeded at a density of 7x10<sup>4</sup> cells per well on glass coverslips placed in 24-well plates. After 24h, the medium was replaced with 160  $\mu\text{L}$  of fresh

culture medium and 160  $\mu\text{L}$  of Cy5-labelled siRNA@MIL-100 / Cy5-labelled siRNA@MIL-101-NH<sub>2</sub> NPs, prepared at a mass ratio of 20:1 at pH=2 and pH=4. In each well, 10  $\mu\text{g}$  of NPs with 1  $\mu\text{g}$  of siRNA were incubated during 4h. Untreated cells and cells treated with free siRNA were included as controls.<sup>10,11</sup>

After the incubation time, cells were extensively washed with PBS to remove the excess of non-internalized NPs, fixed with 4% *p*-formaldehyde for 10 min and cell nuclei counterstained with the nuclear dye DAPI (1:100 in PBS, 5 min). Finally, coverslips were mounted with Mowiol fluorescent mounting medium onto glass slides and cells were examined using a Leica AOBSP5 spectral confocal microscope with resonant scanner, mounted on DMI 6000B inverted microscope, equipped with an Ar laser excitation lines 5 (456, 476, 488, 496, 514 nm), laser diode (561 nm), laser diode (594 nm) and blue laser diode (405 nm).

The images were collected at 405/397 (Ex/Em), 558/568 and 488/409 nm to observe the nucleus, the associated siRNA-Cy5, and Fe self-fluorescence of the NPs, respectively (Figures 1 and 2). Then, images were analyzed using the Leica Application Suite 1.7.0 built 1240, LAS AF software.<sup>6</sup>

**1.8.5. Transfection and gene up-regulation assays.** SW480 cells were seeded at a density of  $250 \times 10^3$  cells *per* well in 6-well plates. After 24 h, medium was replaced with 640  $\mu\text{L}$  of fresh medium and 320  $\mu\text{L}$  of loaded nanoparticles for their transfection (2  $\mu\text{g}$  of non-specific siRNA and 2  $\mu\text{g}$  of miR-145, equivalent to a MIL-100 and MIL-101-NH<sub>2</sub> NPs concentration of 20  $\mu\text{g} \cdot \text{mL}^{-1}$  / well in 960  $\mu\text{L}$  of supplemented culture medium). Lipofectamine<sup>®</sup>2000 was used as a positive control for transfection in the conditions indicated by the manufacturer's protocol (Life Technologies, Paisley, UK). Once the NPs were in contact with SW480 cells for 4 h, they were replaced by fresh medium. After 72h, total microRNA was extracted using the microRNA Purification kit (Norgen Biotek Corporation) following manufacturer's instructions. Purified microRNA was eluted in a final volume of 50  $\mu\text{L}$  and its concentration was measured by spectrophotometry (NanoDrop Spectrophotometer ND-1000, Thermo Scientific). Complementary DNA (cDNA) was synthesized from 1  $\mu\text{g}$  of total microRNA by using the qScript<sup>™</sup> microRNA cDNA Synthesis Kit (Quanta Biosciences). Quantitative real-time PCR was carried out using PerfeCta<sup>®</sup> MicroRNA Assays (Quanta Biosciences). The reaction mix included the cDNA samples previously obtained, SYBR green dye, universal primer and water. The mix was then amplified with the target primer miRNA 145 (hsa-miR-145-5p, IDT) and the housekeeping small RNA control RNU6 (Fisher Scientific). The PCR reaction consisted in an activation of 2 min at 95°C followed by denaturation during 5s at 95°C and annealing for 30s at 60°C. The amount of PCR products was determined respect to SYBR fluorescence collected during the annealing step of each cycle (Stratagene Mx3005P, Agilent Technologies). Quantitative data was analyzed by using the MxPro software, and relative quantification of miRNA 145 was derived by the delta Ct method, as described by Schmittgen and Livak.<sup>12</sup> Relative expression levels of miRNA 145 in each treatment group were obtained after normalizing the CT values of miRNA 145 against that of an endogenous reference gene (RNU6).

## Figures and Tables

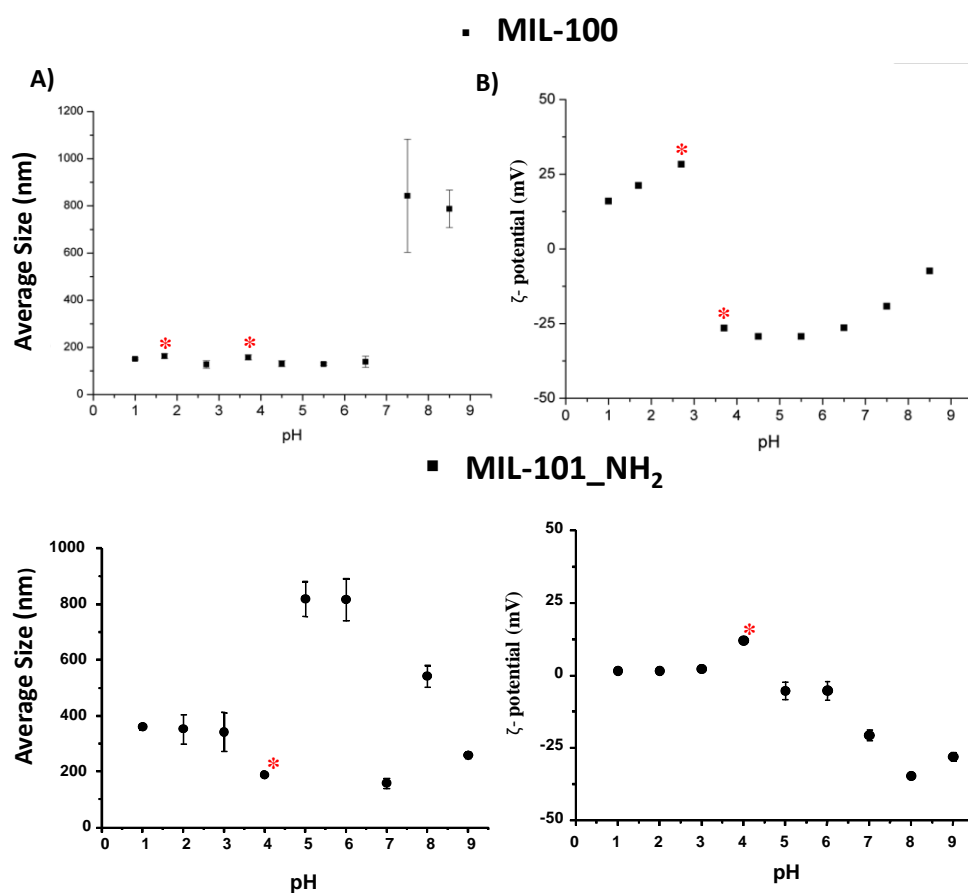

**Figure S1.** A) Average size (nm) and B)  $\zeta$ -potential evolution (mV) of MIL-100 and MIL-101\_NH<sub>2</sub> NPs vs. as a function of the pH (\* highlighting the most suitable conditions of each nanoMOF).

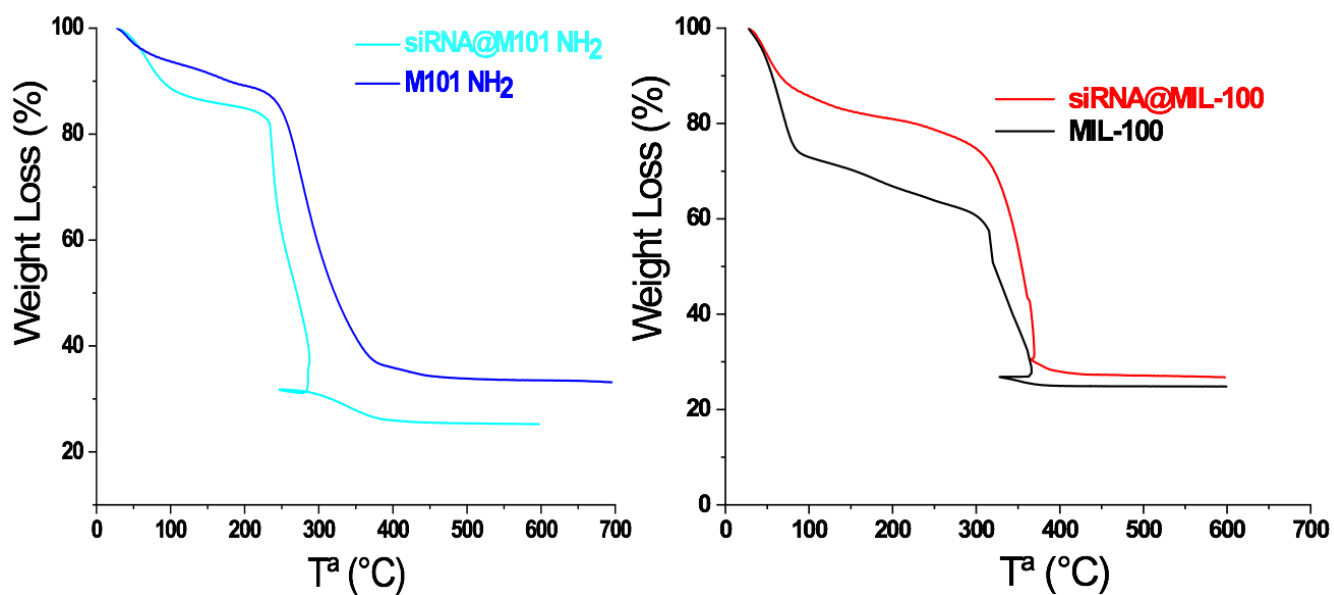

**Figure S2.** TGA of MIL-100 (black) and MIL-101\_  $\text{NH}_2$  NPs (blue), before and after siRNA association (red and light blue line, respectively) at pH 4.

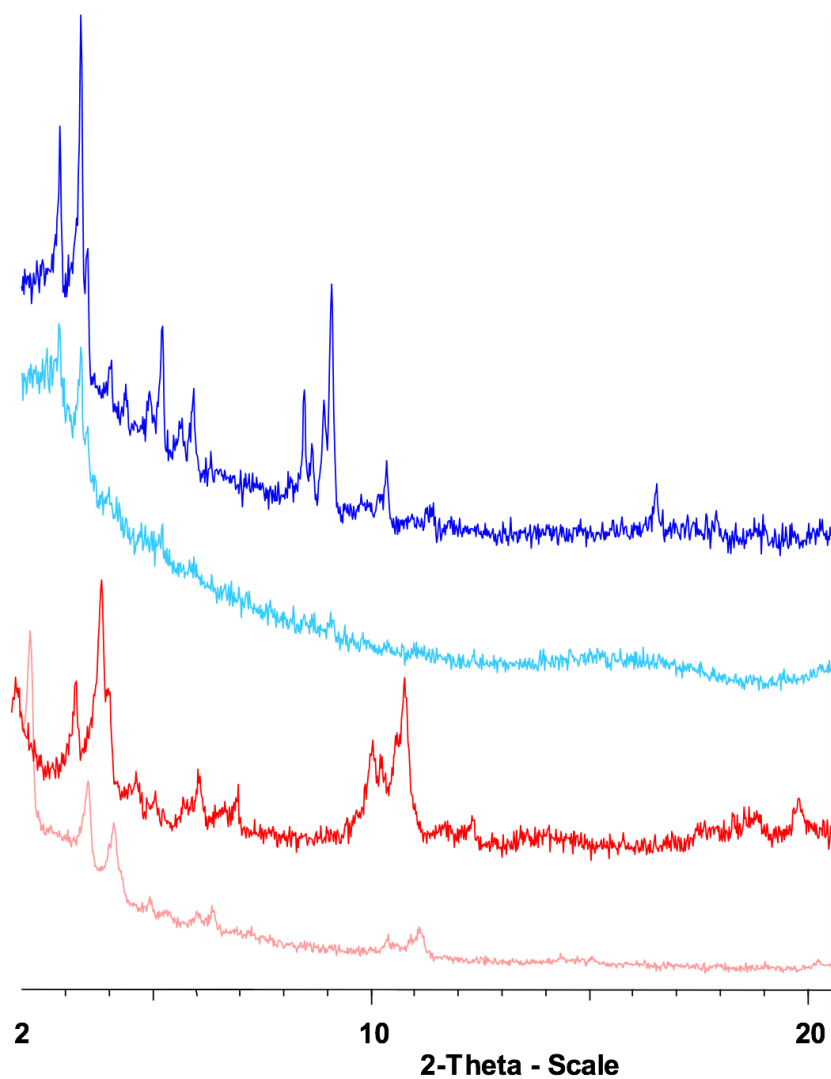

**Figure S3.** XRPD patterns of MIL-100 (red) and MIL-101\_  $\text{NH}_2$  NPs before (dark line) and after (light line) association of siRNA at pH 4.

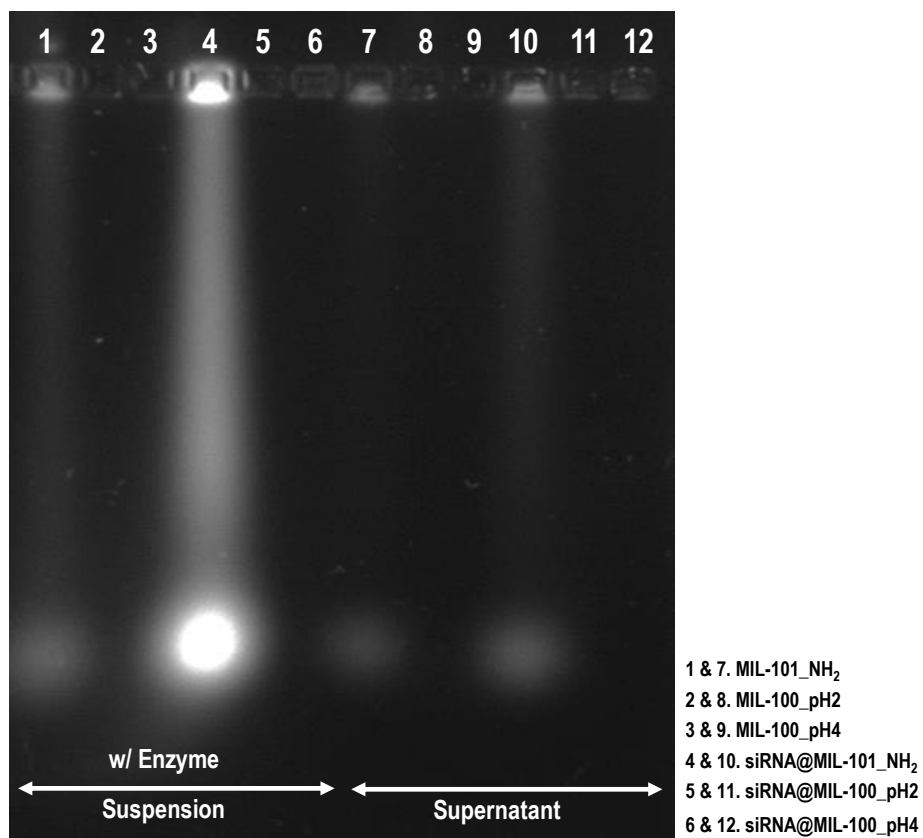

**Figure S4.** Agarose gel (1%) stained with SYBR® Gold for the enzyme degradation protection analysis of different systems: MOF & siRNA@MOF suspensions with their supernatants.

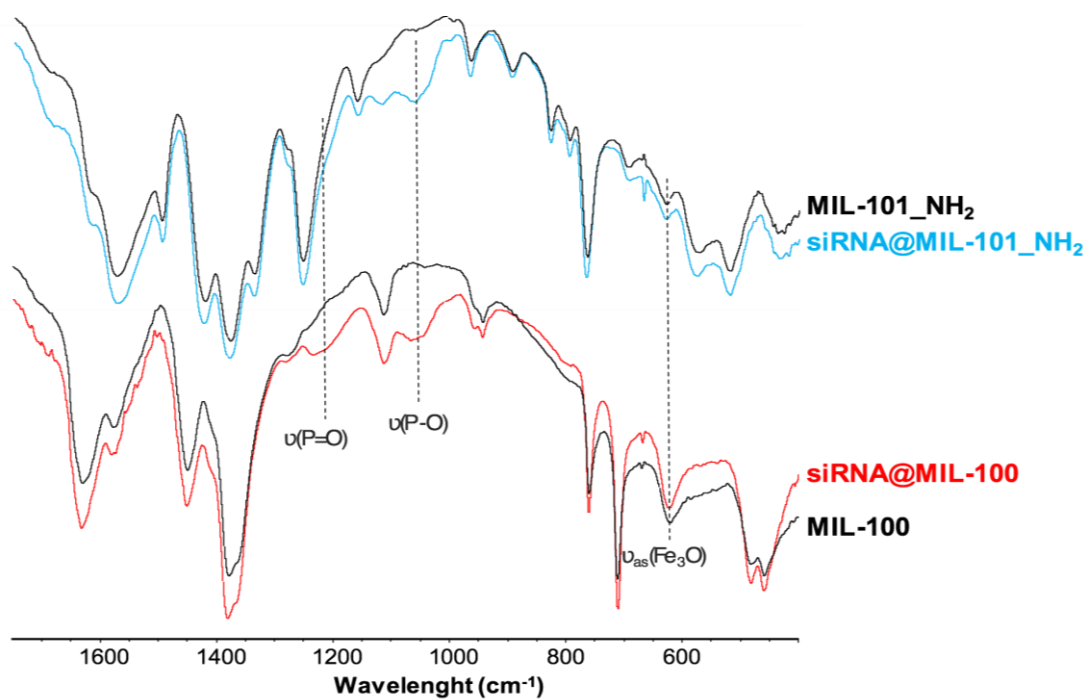

**Figure S5.** FTIR spectra of MIL-100 and MIL-101\_NH<sub>2</sub> NPs before and after siRNA encapsulation at pH 4.



**Table S1.** Overview of particle size and  $\zeta$ -potential of MIL-100 (A) and MIL-101\_NH<sub>2</sub> (B) NPs in different media (aqueous solution, PBS-FBS and DMEM) at 37°C before and after siRNA association.

| A)                       | Media            | MIL-100           |                   | siRNA@MIL-100     |                   |
|--------------------------|------------------|-------------------|-------------------|-------------------|-------------------|
|                          |                  | pH=2              | pH=4              | pH=2              | pH=4              |
| Size (nm)<br>(PdI)       | H <sub>2</sub> O | 154 ± 43<br>(0.2) | 195 ± 48<br>(0.2) | 172 ± 25<br>(0.4) | 191 ± 34<br>(0.4) |
|                          | PBS-FBS          | 167 ± 23<br>(0.3) | 209 ± 62<br>(0.3) | 202 ± 78<br>(0.4) | 366 ± 60<br>(0.4) |
|                          | DMEM             | 172 ± 74<br>(0.3) | 170 ± 69<br>(0.3) | 277 ± 34<br>(0.5) | 253 ± 42<br>(0.5) |
| $\xi$ -potential<br>(mV) | H <sub>2</sub> O | +9 ± 1            | -21 ± 1           | -4 ± 1            | -14 ± 2           |
|                          | PBS-FBS          | +10 ± 0           | +3 ± 0            | +23 ± 3           | +4 ± 2            |
|                          | DMEM             | +11 ± 1           | -11 ± 1           | -1 ± 1            | -6 ± 1            |

| B)                       | Media            | MIL-101_NH <sub>2</sub> | siRNA@MIL-101_NH <sub>2</sub> |
|--------------------------|------------------|-------------------------|-------------------------------|
|                          |                  | pH=4                    | pH=4                          |
| Size (nm)<br>(PdI)       | H <sub>2</sub> O | 289 ± 2<br>(0.2)        | 240 ± 52<br>(0.3)             |
|                          | PBS-FBS          | 422 ± 7<br>(0.5)        | 344 ± 77<br>(0.5)             |
|                          | DMEM             | 287 ± 11<br>(0.4)       | 308 ± 96<br>(0.4)             |
| $\xi$ -potential<br>(mV) | H <sub>2</sub> O | +12 ± 1                 | -13 ± 0                       |
|                          | PBS-FBS          | +7 ± 0                  | +8 ± 1                        |
|                          | DMEM             | +8 ± 1                  | +5 ± 1                        |

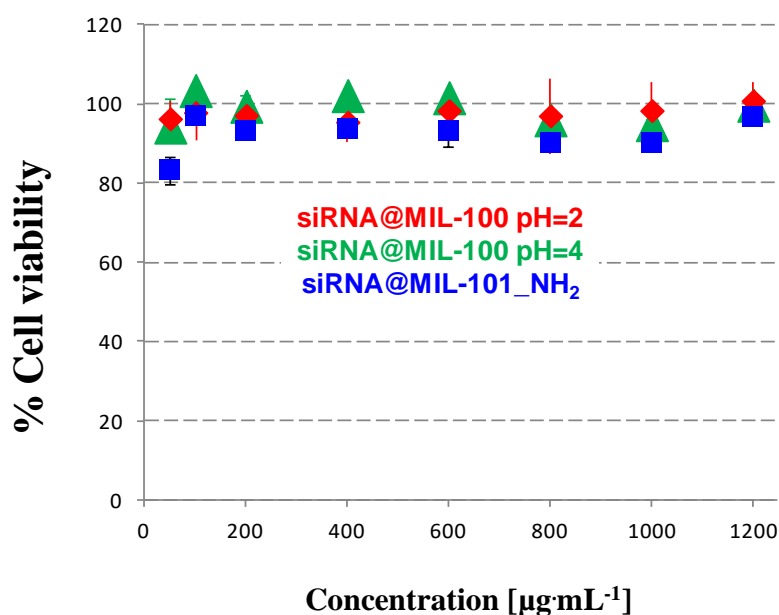

**Figure S6.** Cell viability of SW480 cell line after 24 h incubation with siRNA@MIL-100 (pH=2; in red and 4; in green) and siRNA@MIL-101\_NH<sub>2</sub> NPs (in blue). Note that the shown data correspond for each concentration to the average of triplicates obtained in two independent experiments ( $n=6$ ). The vertical error bars drawn in the diagram indicate the range of fluctuations from which the standard deviations were calculated.

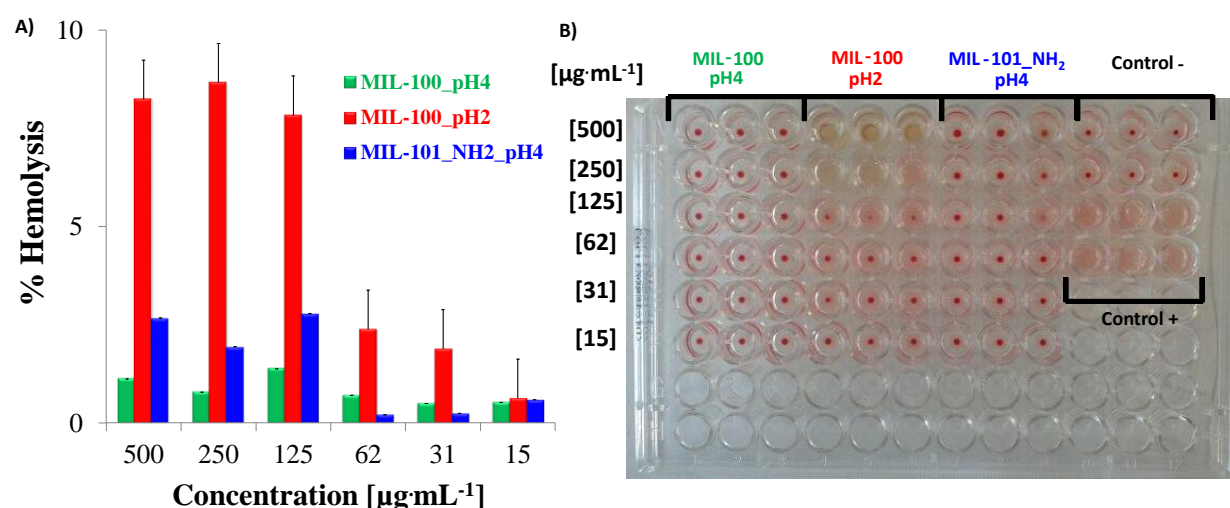

**Figure S7.** A) Percentage of released haemoglobin after a 15 min incubation of human blood with different concentrations (from 500 to 15  $\mu\text{g}\cdot\text{mL}^{-1}$ ) of the siRNA\_MIL-100 (pH=2 in red or pH=4 in green) and siRNA\_MIL-101\_NH<sub>2</sub> (in blue). B) Image of the hemolysis assays of each NP concentration after 15 min of incubation.

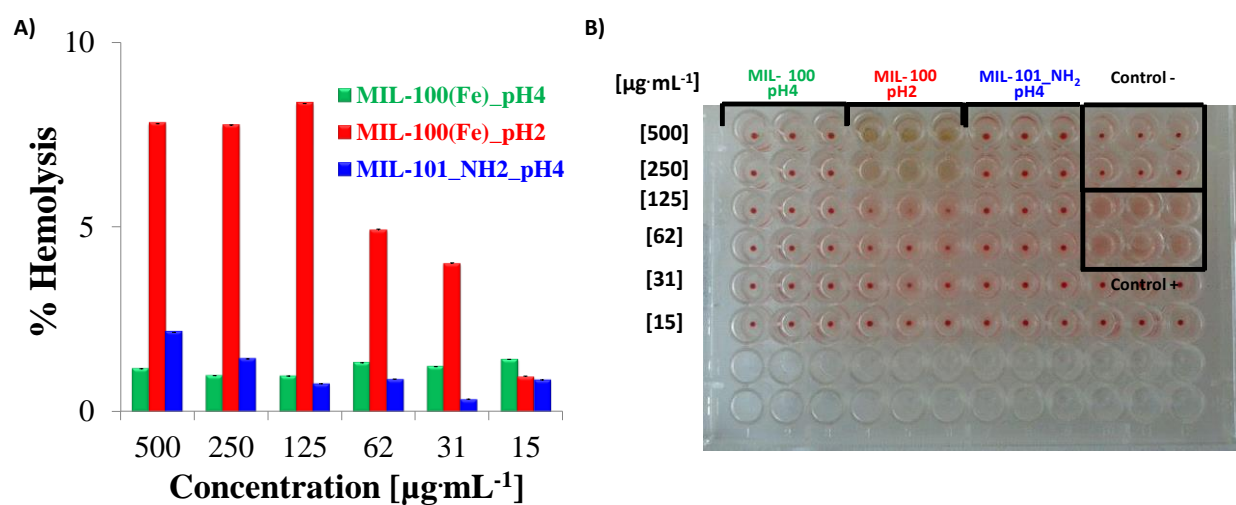

**Figure S8.** A) Percentage of released haemoglobin after a 1 h incubation of human blood with different concentrations (from 500 to 15  $\mu\text{g}\cdot\text{mL}^{-1}$ ) of the siRNA@MIL-100 (pH=2 in red or pH=4 in green) and siRNA@MIL-101\_NH<sub>2</sub> (in blue). B) Image of the hemolysis assays of each NP concentration after 1h incubation.

## MIL-100 pH2

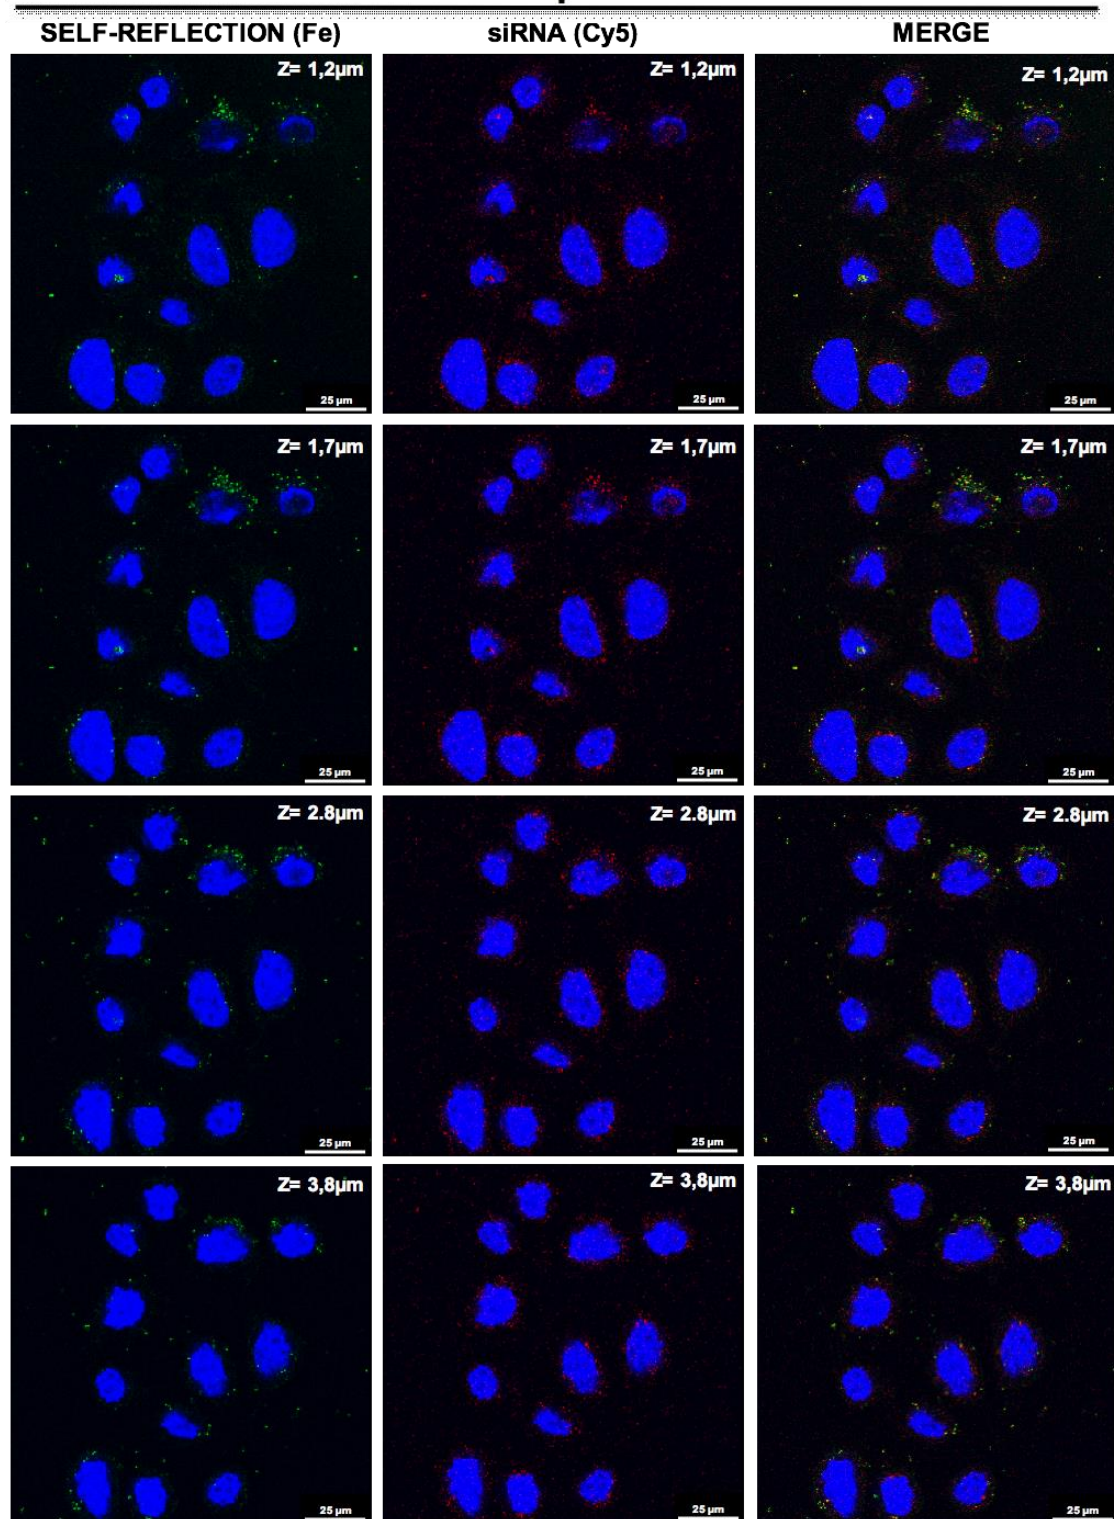

**Figure S9.** Confocal microscopy images at different depths in the Z-axis of SW480 cell line after 4h of incubation with Cy5-siRNA@MIL-100 (pH=2). MIL-100 NPs, tracked by the iron self-reflection signal, Cy5-labelled siRNA and nucleus, stained with DAPI, are visible in green, red and blue, respectively. The scale bar corresponds to 25 µm. All the images were taken at 63X.



## MIL-100 pH4

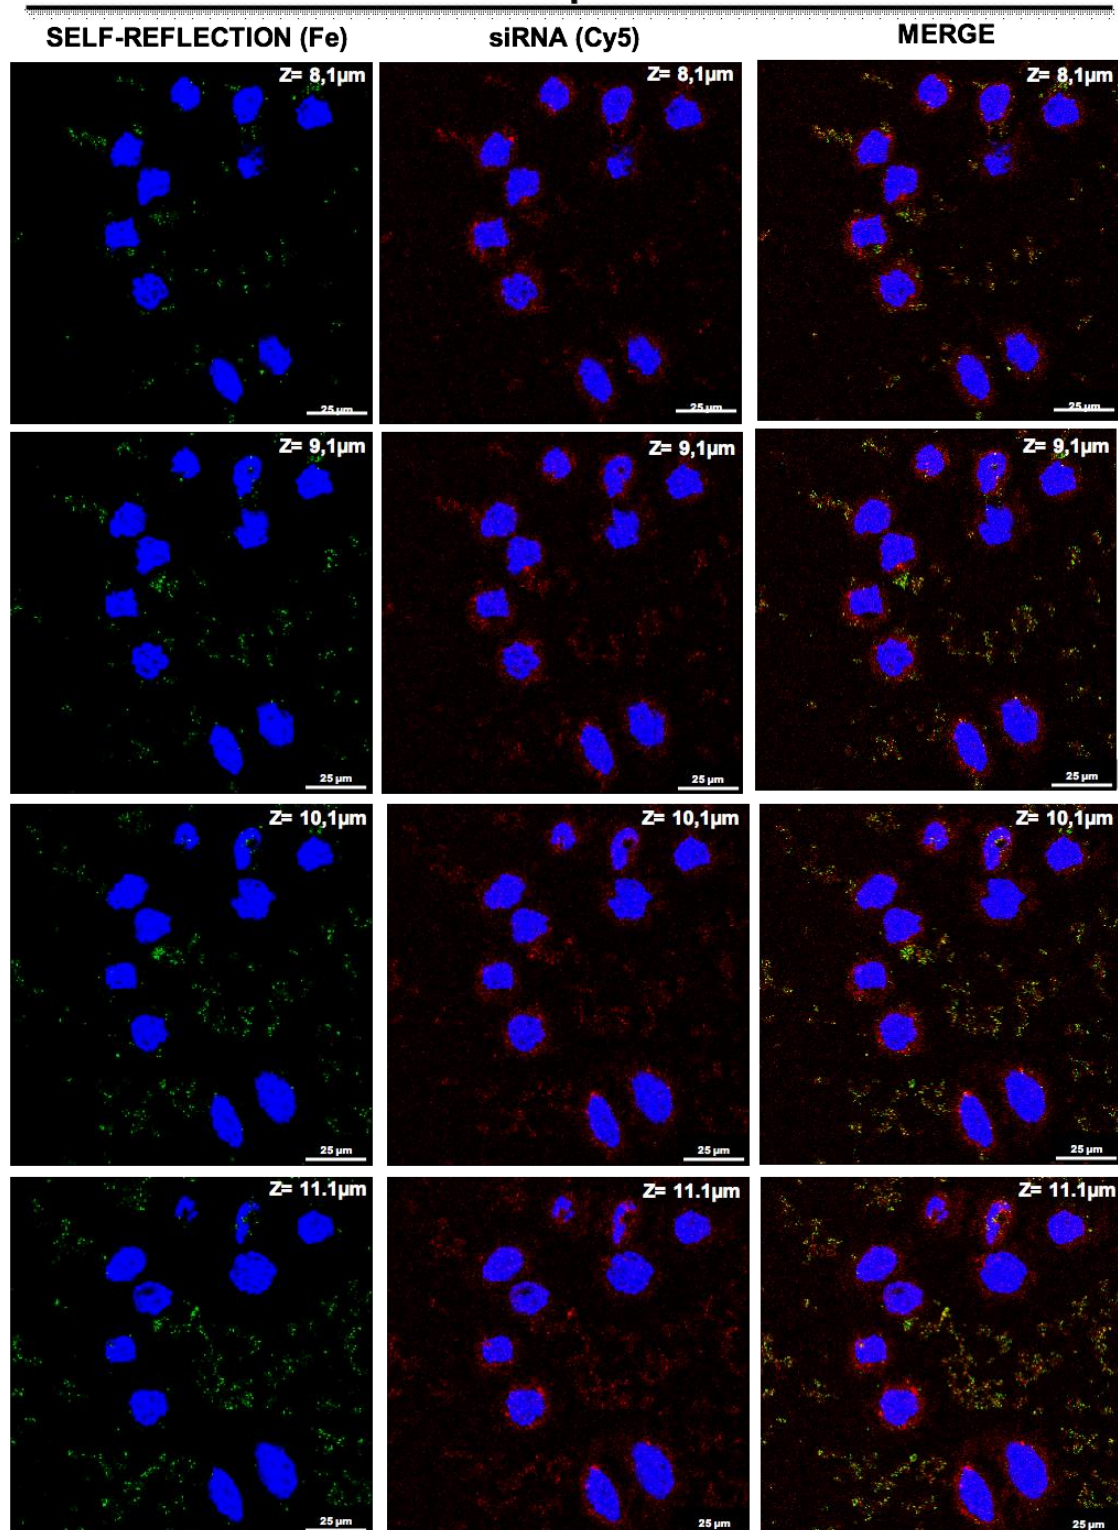

**Figure S10.** Confocal microscopy images at different depths in the Z-axis of SW480 cell line after 4 h of incubation with Cy5-siRNA@MIL-100 (pH=4). MIL-100 NPs, tracked by the iron self-reflection signal, Cy5-labelled siRNA and nucleus, stained with DAPI, are visible in green, red and blue, respectively. The scale bar corresponds to 25 µm. All the images were taken at 63X.

## MIL-101\_NH<sub>2</sub> pH4

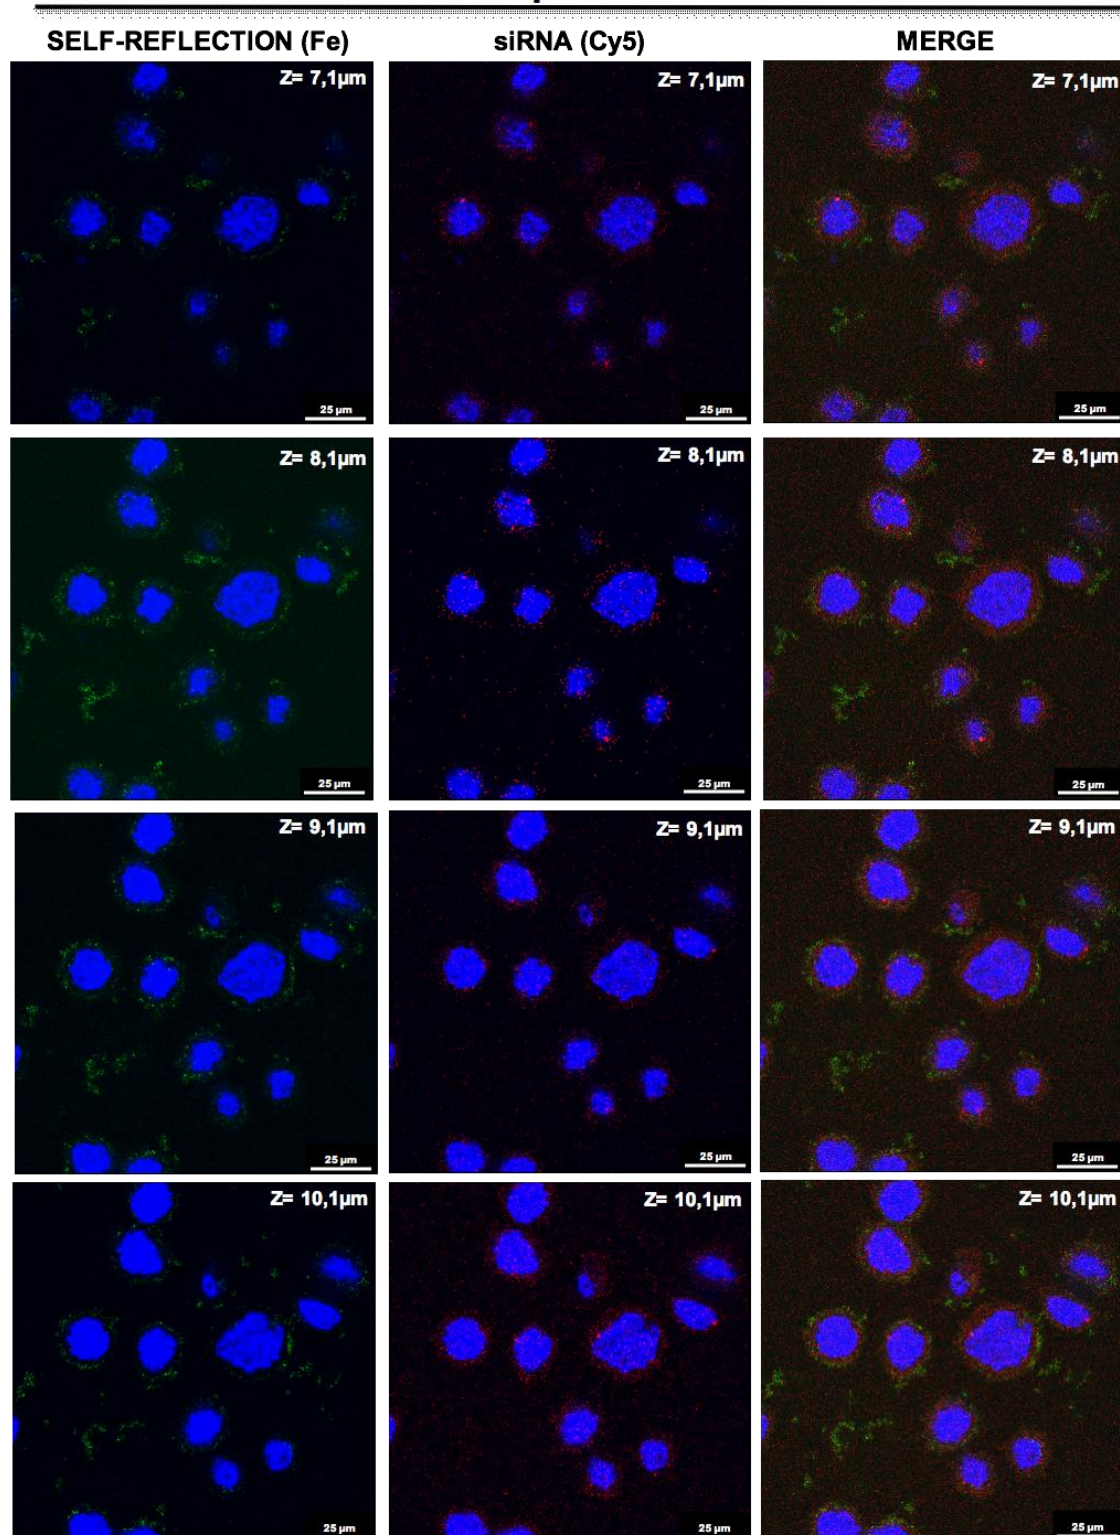

**Figure S11.** Confocal microscopy images at different depths in the Z-axis of SW480 cell line after 4 h incubation with Cy5-siRNA@MIL-101\_NH<sub>2</sub> (pH=4). MIL-101\_NH<sub>2</sub> NPs, tracked by the iron self-reflection signal, Cy5-labelled siRNA and nucleus, stained with DAPI, are visible in green, red and blue, respectively. The scale bar corresponds to 25 μm. All the images were taken at 63X.

## References

---

- <sup>1</sup> A. García-Márquez, A. Demessence, A.E. Platero-Prats, D. Heurtaux, P. Horcajada, C. Serre, J.S. Chang, G. Férey, V.A. Peña-O'Shea, C. Boissière, D. Grosso and C. Sanchez, *Eur. J. Inorg. Chem.*, 2012, **32**, 5165.
- <sup>2</sup> P. Horcajada, H. Chevreau, D. Heurtaux, F. Benyettou, F. Salles, T. Devic, A. Garcia-Marquez, C. Yu, H. Lavrard, C.L. Dutson, E. Magnier, G. Maurin, E. Elkaim and C. Serre, *Chem. Commun.*, 2014, **50**, 6872.
- <sup>3</sup> S. Bauer, C. Serre, T. Devic, P. Horcajada, J. Marrot and G. Férey, *Inorg. Chem.*, 2008, **47**, 7568.
- <sup>4</sup> T. Chalati, P. Horcajada, P. Couvreur, C. Serre, M. Ben-Yahia, G. Maurin and R. Gref, *Nanomedicine*, 2011, **6**, 1683.
- <sup>5</sup> M. Raviña, E. Cubillo, D. Olmeda, R. Novoa-Carballal, E. Fernandez-Megia, R. Riguera, A. Sánchez, A. Cano and M.J. Alonso, *Pharm. Res.*, 2010, **27**, 2544-2555.
- <sup>6</sup> B. Kong, J.H. Seog, L.M. Graham and S.B. Lee, *Nanomedicine*, 2011, **6**, 929.
- <sup>7</sup> E. Bellido, M. Guillevic, T. Hidalgo, M.J. Santander-Ortega, C. Serre and P. Horcajada, *Langmuir*, 2014, **30**, 5911.
- <sup>8</sup> M. de la Fuente, M.C. Jones, M.J. Santander-Ortega, A. Mirenska, P. Marimuthu, I. Uchegbu and A. Schätzlein, *Nanomedicine*, 2015, **11**, 369.
- <sup>9</sup> M. de la Fuente, M. Raviña, A. Sousa-Hervés, J. Correa, R. Riguera, E. Fernandez-Megia, A. Sánchez and M.J. Alonso, *Nanomedicine*, 2012, **7**, 1667.
- <sup>10</sup> C. Tamames-Tabar, D. Cunha, E. Imbuluzqueta, F. Ragon, C. Serre, M.J. Blanco-Prieto and P. Horcajada, *J. Mater. Chem. B*, 2014, **2**, 262.
- <sup>11</sup> E. Bellido, T. Hidalgo, M.V. Lozano, M. Guillevic, R. Simon-Vazquez, M.J. Santander-Ortega, A. Gonzalez-Fernandez, C. Serre, M.J. Alonso and P. Horcajada, *Adv. Healthc. Mater.*, 2015, **4**, 1246.
- <sup>12</sup> T.D. Schmittgen and K.J. Livak, *Nat. Protoc.*, 2008, **3**, 1101.
